# Supplementary material
Source: PubMed Central journal article supplement (PMC2722270)
Supplement: 0906606106_0906606106SI.pdf [file 0906606106_0906606106SI.pdf]

# Supporting Information

Guo et al. 10.1073/pnas.0906606106

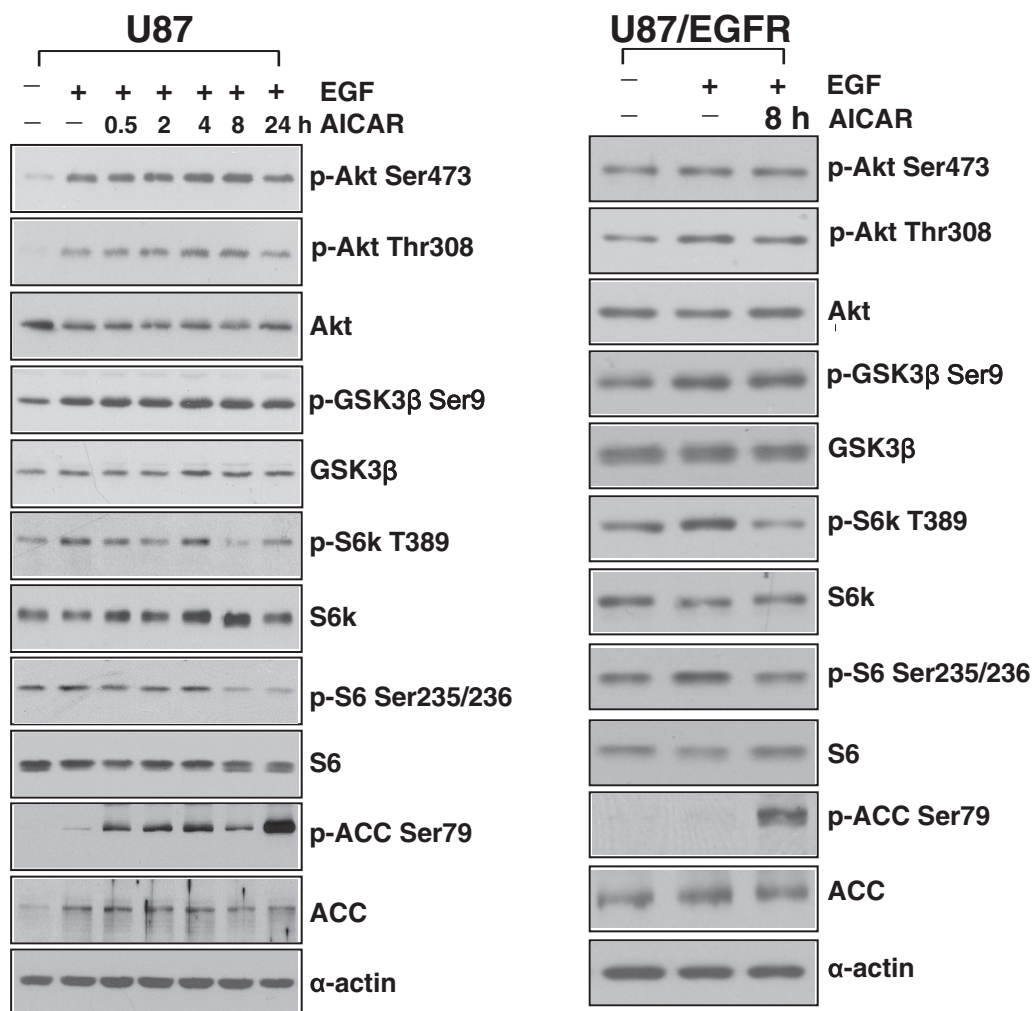

**Fig. S1.** AICAR treatment does not promote Akt Ser-473 or Akt Thr-308 phosphorylation. U87 or U87-EGFR cells, were treated with AICAR (0.5 mM) for up to 24 h, then EGF (10 ng/mL) for 15 min, and the effect on signaling proteins was determined by immunoblot analysis with indicated antibodies.

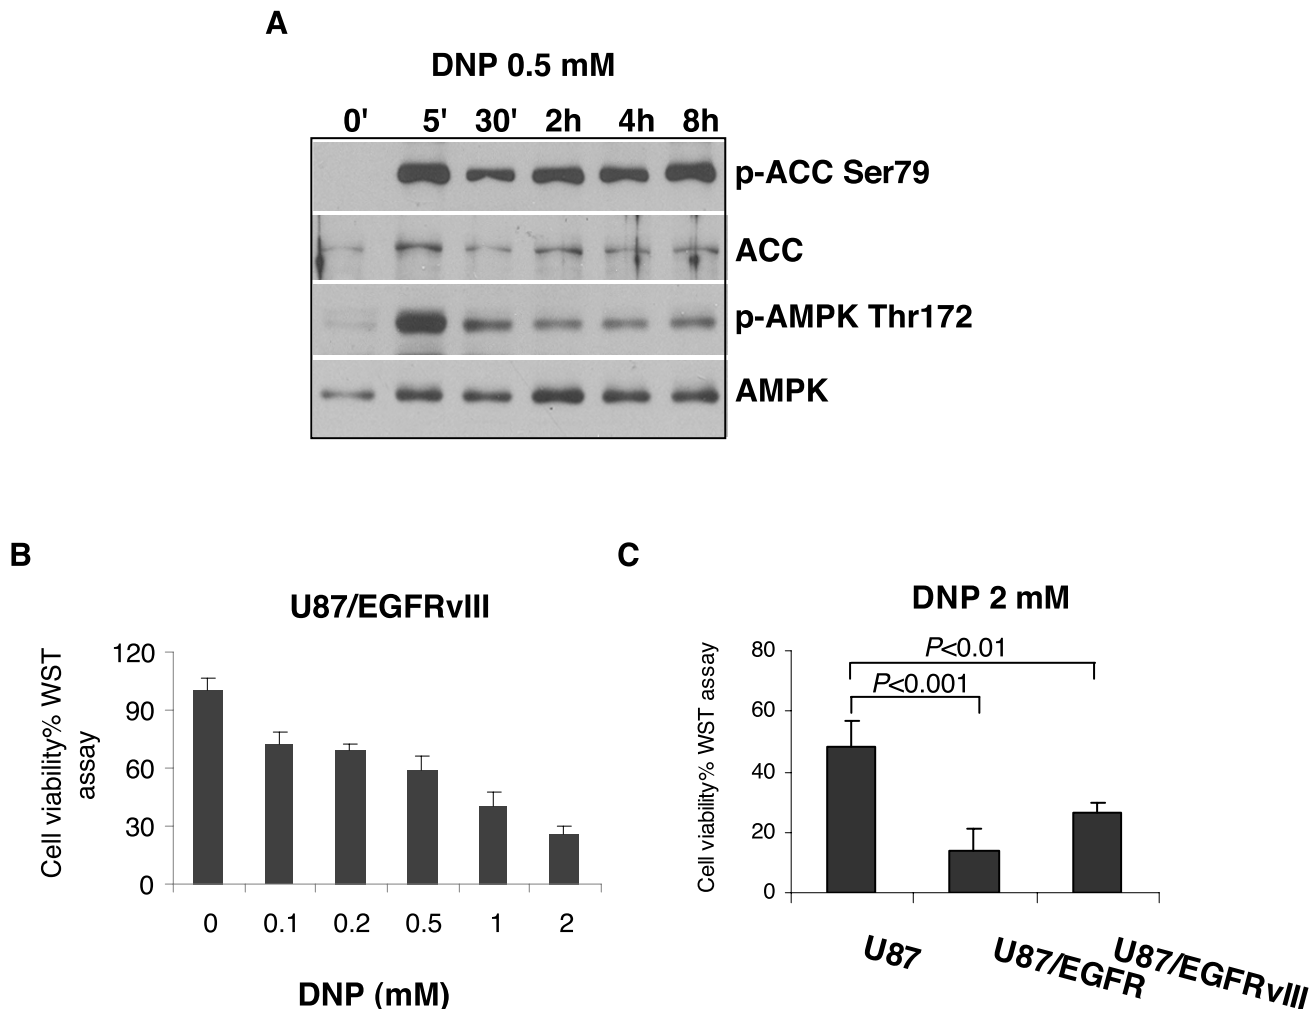

**Fig. S2.** Activation of AMPK through an alternative mechanism inhibits glioblastoma growth with preferential inhibition in EGFR-activated tumor cells. 2, 4-dinitrophenol (DNP) activates AMPK by lowering ATP via inhibition of oxidative phosphorylation, thus increasing the AMP/ATP ratio. (A) Western blot analysis of effect of DNP on AMPK and ACC. U87-EGFRvIII cells were plated and 24 h later treated with DNP (0.5 mM) for up to 8 h. AMPK activation was determined by probing cellular lysates with antibodies against AMPK Thr-172 and ACC Ser-79 phosphorylation. (B) U87-EGFRvIII cells were plated and 24 h later, treated with a range of concentrations of DNP in 1% FBS conditions for 3 days. Relative cell number was assessed using the WST assay (Chemicon). (C) DNP is significantly more effective at blocking the growth of EGFRvIII or EGFR expressing glioblastoma cells. U87, U87/EGFR, and U87/EGFRvIII cell lines were treated for 3 days with DNP (2 mM) and relative proliferation was measured by the WST assay (Chemicon). Control cells were treated by ethanol, the diluent, alone (1:1,000).

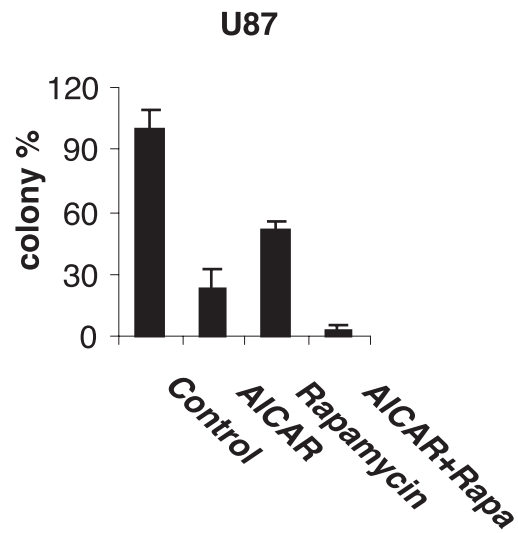

**Fig. S3.** Effect of AICAR and rapamycin treatment on U87 glioblastoma cell colony growth. U87 glioblastoma cells were seeded at a density of 500 cells per 60-mm dish, 24 h later, medium was changed and AICAR (0.5 mM) and/or rapamycin (1 nM) was added. The medium, including AICAR or rapamycin, was replenished every 3 days. Three weeks after initial treatment, cultures were fixed with 4% formaldehyde (Sigma) in PBS and stained with a 0.5% crystal violet solution (Sigma) in 25% methanol. Colonies of more than 50 cells were counted. Control cells were treated with the diluent, ethanol (1:1,000).

**A**

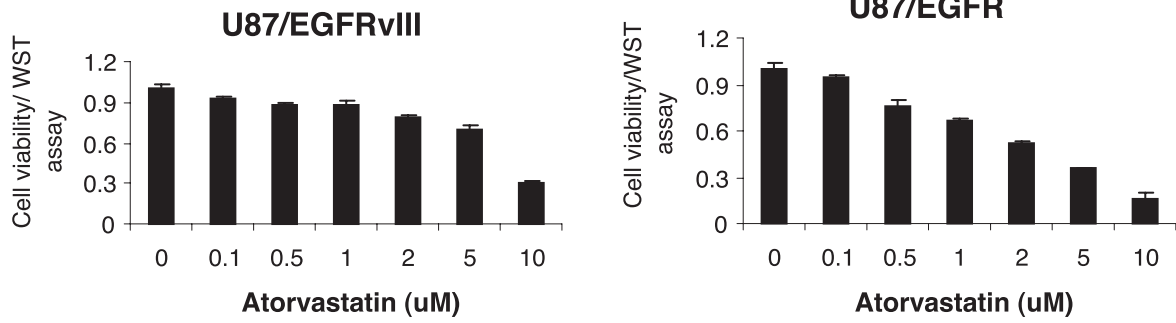

**B**

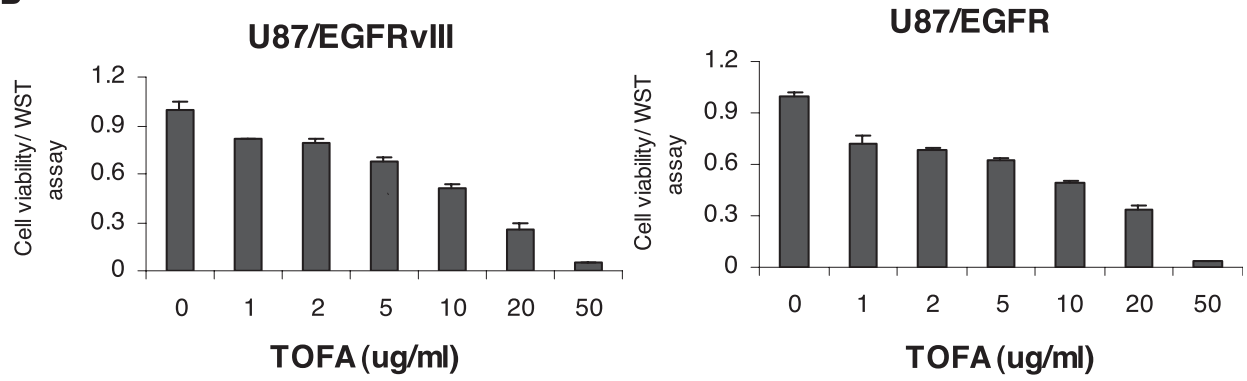

**Fig. S4.** Dose–response of U87-EGFRvIII and U87-EGFR glioblastoma cells to atorvastatin and TOFA. U87-EGFRvIII, and U87-EGFR cells were plated in 96-well dishes for 24 h and then treated with atorvastatin (A) or TOFA (B) for 3 days in 1% FBS at doses indicated. Relative cell number/viability was measured using the WST assay (Chemicon). Ethanol (1:1,000) as control for atorvastatin; DMSO (1:1,000) as control for TOFA treatment.

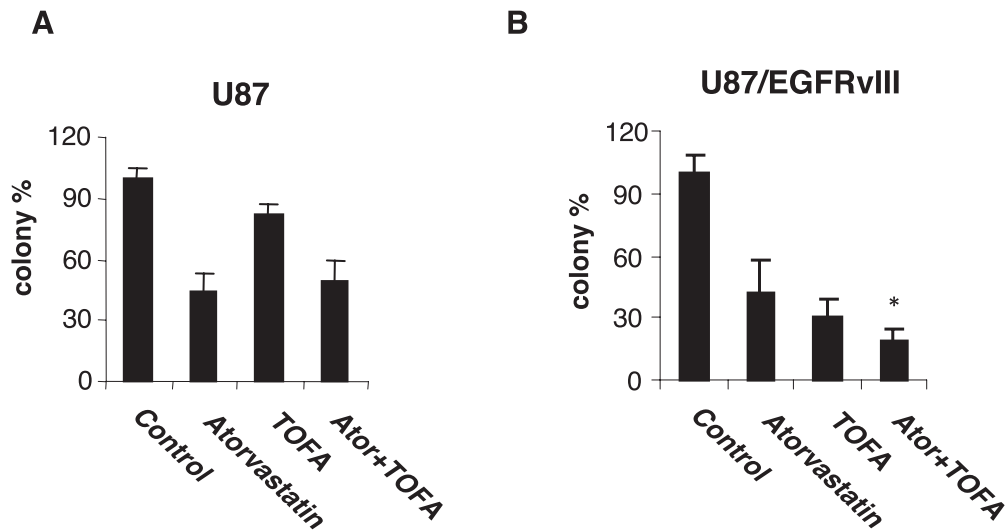

**Fig. S5.** Effect of inhibition of HMG-CoA reductase and ACC on glioblastoma cell colony growth. U87 and U87-EGFRvIII glioblastoma cells were seeded at a density of 500 cells per 60-mm dish, and 24 h later, medium was changed and atorvastatin (Ator 1  $\mu$ M) and/or TOFA (10  $\mu$ g/mL) was added. The medium, including atorvastatin (Ator) and TOFA, was replenished every 3 days. Three weeks after initial treatment, cultures were fixed with 4% formaldehyde (Sigma) in PBS and stained with a 0.5% crystal violet solution (Sigma) in 25% methanol. Colonies of more than 50 cells were counted. The experiment was repeated 3 times. Colony number was normalized with control group, into which DMSO alone was added, *P* value was determined using student *t* Test. (A and B) Evidence for enhanced efficacy by combining atorvastatin and TOFA in blocking clonogenic growth of U87-EGFRvIII cells (B), \*, *P* < 0.05 compared with TOFA treatment. No such combination benefit is detected in non-EGFRvIII expressing U87 cells (A). Control cells treated by DMSO (1:1,000).

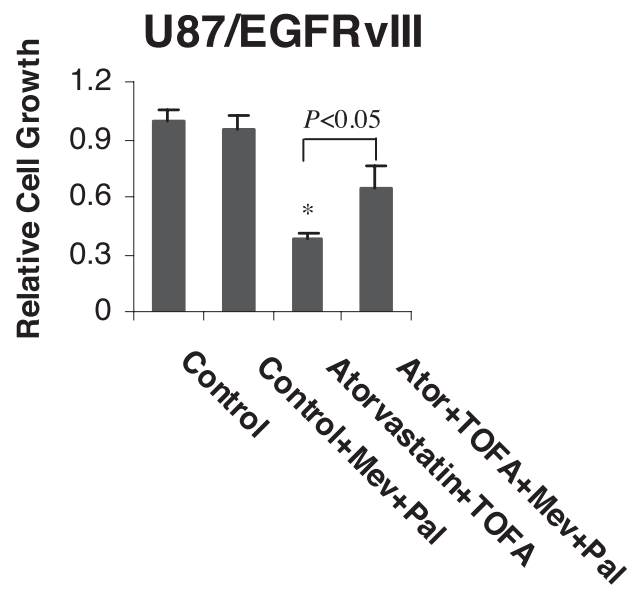

**Fig. S6.** Addition of mevalonate (Mev) and palmitate (Pal) rescued cell growth inhibited by atorvastatin ( $1 \mu\text{M}$ ) and TOFA ( $10 \mu\text{g/mL}$ ). U87-EGFRvIII cells were plated, 24 h later they were treated with either atorvastatin and TOFA at indicated doses, mevalonate and palmitate ( $100 \mu\text{M}$ ) or atorvastatin (Ator) and TOFA plus mevalonate and palmitate. Cells were treated for 3 days and relative cell growth was determined by the WST assay. \*,  $P < 0.0001$  compared with control cells treated DMSO (1:1,000).

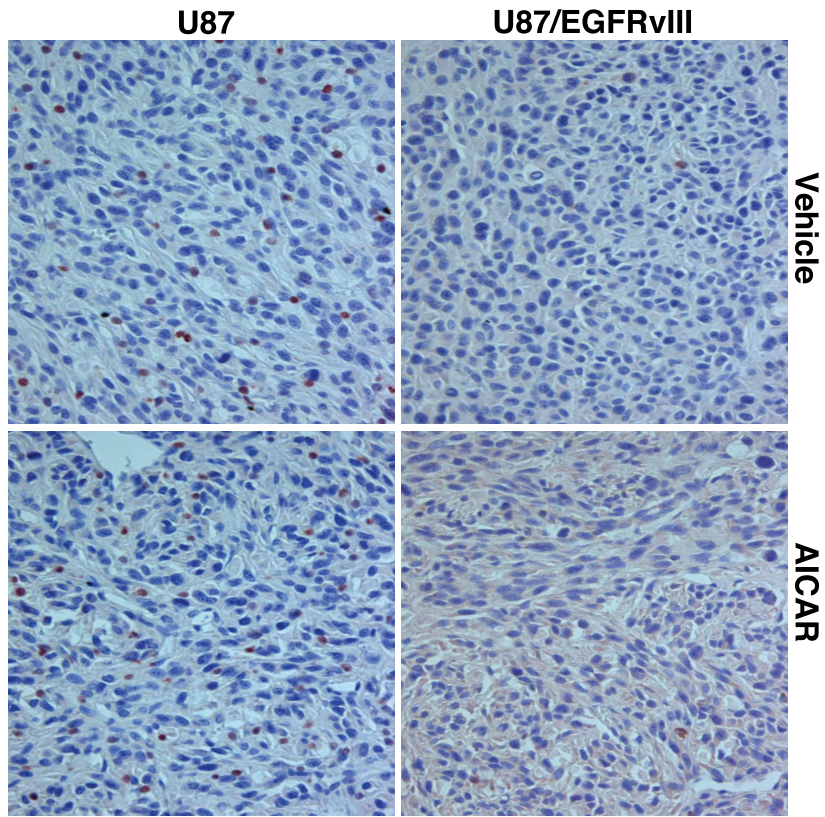

**Fig. S7.** AICAR treatment did not induce apoptotic cell death in vivo. TUNEL immunohistochemical staining was performed on AICAR-treated or vehicle (PBS)-treated xenografts. No increase in TUNEL positive cells was detected after treatment with AICAR (quantitation not shown as no difference was seen). EGFRvIII expressing tumors have lower baseline apoptosis.
